# Supplementary material for: Geochemical Baselines and Contamination Sources of Heavy Metals in Urban Soils of the Kathmandu Valley
Source: Research Square preprint supplement (doi:10.21203/rs.3.rs-8500418/v1), 2026-01-22
Supplement: Supplementary file 1 [file d2121c0f25ff1265aeb822b0.docx]

**
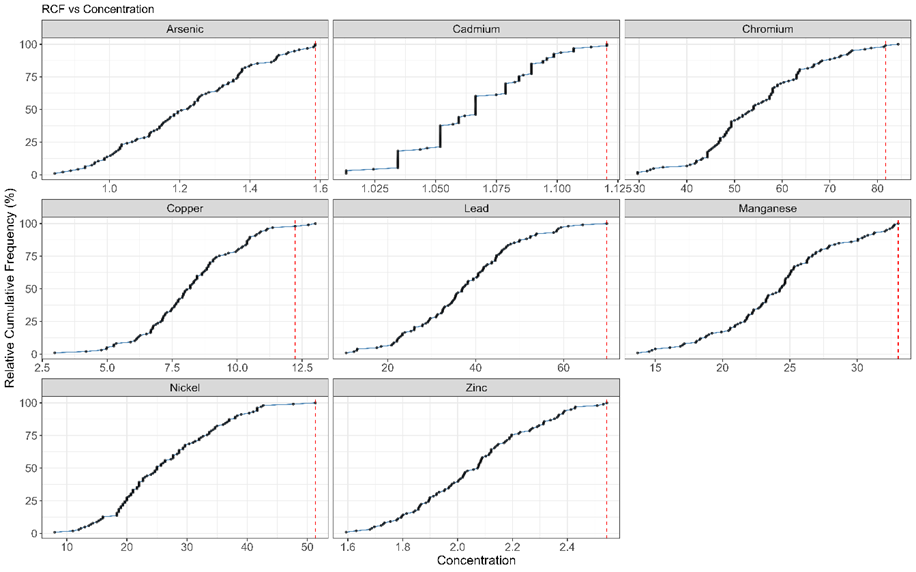
Supplementary Figures**:

**Figure S1**: Relative cumulative frequency curve of eight heavy metals in soil (red line indicates the inflection point determined through consecutive linear fitting/maximum value removal).


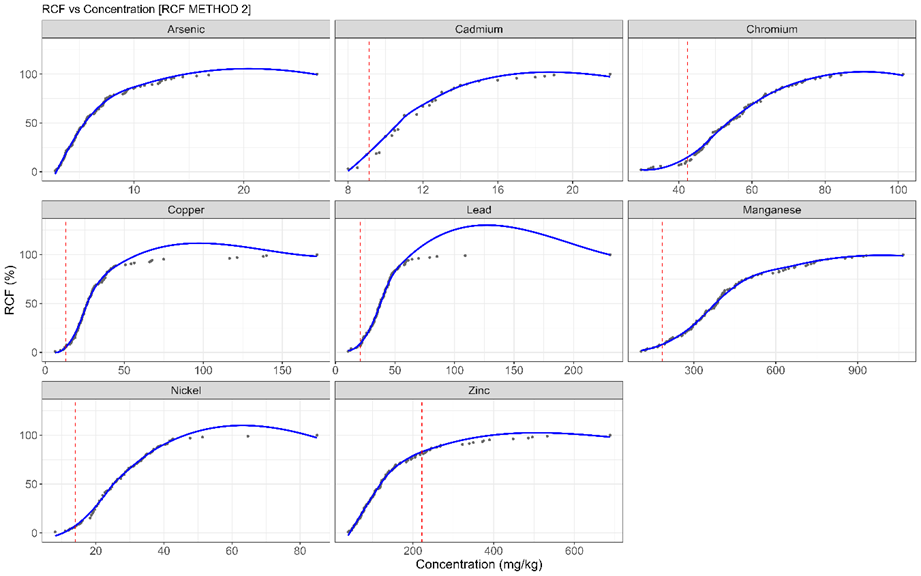


**Figure S2**: Relative cumulative frequency curve of eight heavy metals in soil; red line indicates the inflection point determined through Kneedle Algorithm)

**Table S1**: Heavy metal pollution values (mean with 95% confidence interval) using Geochemical Baseline Values (GBV) compared with UCC (Taylor & McLenan, 1995) and WSBV (Kabata-Pendias, 2011).

| Elements | | | Igeo | | | EF | | | PI | | |
| --- | --- | --- | --- | --- | --- | --- | --- | --- | --- | --- | --- |
| UCC | WSBV | GBV | UCC | WSBV | GBV | UCC | WSBV | GBV |
| As | Mean |  | 1.40 | -0.79 | -0.58 | 2.30 | 0.71 | 0.59 | 4.43 | 0.97 | 1.12 |
| 95% CI | Upper Limit | 1.52 | -0.66 | -0.46 | 2.67 | 0.82 | 0.68 | 4.91 | 1.08 | 1.24 |
|  | Lower Limit | 1.27 | -0.92 | -0.71 | 1.94 | 0.60 | 0.49 | 3.96 | 0.87 | 1.00 |
| Cd | Mean |  | 6.27 | 4.21 | -0.21 | 62.58 | 21.02 | 0.70 | 118.46 | 28.31 | 1.32 |
| 95% CI | Upper Limit | 6.33 | 4.27 | -0.16 | 73.60 | 24.72 | 0.83 | 123.64 | 29.55 | 1.38 |
|  | Lower Limit | 6.21 | 4.15 | -0.27 | 51.56 | 17.32 | 0.58 | 113.27 | 27.07 | 1.26 |
| Cr | Mean |  | 0.04 | -0.73 | -0.01 | 0.75 | 0.62 | 0.74 | 1.58 | 0.93 | 1.53 |
| 95% CI | Upper Limit | 0.10 | -0.66 | 0.06 | 0.81 | 0.67 | 0.79 | 1.65 | 0.97 | 1.60 |
|  | Lower Limit | -0.02 | -0.79 | -0.07 | 0.70 | 0.58 | 0.68 | 1.51 | 0.89 | 1.46 |
| Cu | Mean |  | -0.40 | -1.04 | 0.92 | 0.67 | 0.61 | 1.69 | 1.35 | 0.87 | 3.38 |
| 95% CI | Upper Limit | -0.25 | -0.89 | 1.07 | 0.78 | 0.70 | 1.96 | 1.56 | 1.00 | 3.89 |
|  | Lower Limit | -0.55 | -1.19 | 0.77 | 0.57 | 0.51 | 1.43 | 1.15 | 0.74 | 2.88 |
| Pb | Mean |  | 0.30 | -0.14 | 0.70 | 1.05 | 1.10 | 1.40 | 2.04 | 1.51 | 2.69 |
| 95% CI | Upper Limit | 0.41 | -0.02 | 0.82 | 1.23 | 1.28 | 1.64 | 2.26 | 1.68 | 2.99 |
|  | Lower Limit | 0.18 | -0.26 | 0.58 | 0.88 | 0.91 | 1.17 | 1.81 | 1.34 | 2.39 |
| Mn | Mean |  | -1.26 | -0.94 | 0.83 | 0.38 | 0.66 | 1.62 | 0.70 | 0.87 | 2.97 |
| 95% CI | Upper Limit | -1.13 | -0.81 | 0.96 | 0.46 | 0.82 | 1.99 | 0.76 | 0.95 | 3.24 |
|  | Lower Limit | -1.39 | -1.07 | 0.70 | 0.29 | 0.51 | 1.25 | 0.64 | 0.79 | 2.71 |
| Ni | Mean |  | -0.23 | -0.77 | 0.54 | 0.68 | 0.66 | 1.18 | 1.37 | 0.95 | 2.35 |
| 95% CI | Upper Limit | -0.13 | -0.66 | 0.65 | 0.75 | 0.73 | 1.30 | 1.48 | 1.02 | 2.53 |
|  | Lower Limit | -0.34 | -0.88 | 0.44 | 0.61 | 0.59 | 1.06 | 1.26 | 0.87 | 2.17 |
| Zn | Mean |  | 0.27 | 0.29 | -0.25 | 1.11 | 2.81 | 0.78 | 2.21 | 2.24 | 1.54 |
| 95% CI | Upper Limit | 0.43 | 0.45 | -0.08 | 1.28 | 3.22 | 0.90 | 2.52 | 2.55 | 1.76 |
|  | Lower Limit | 0.10 | 0.12 | -0.42 | 0.95 | 2.40 | 0.67 | 1.90 | 1.92 | 1.33 |

**Table S2**: Organic matter content of the eighty-five soil samples of Kathmandu Valley.

| Sample ID | Soil Weight (gram) | Ferrous ammonium sulphate (FAS) value | Organic matter (%) |
| --- | --- | --- | --- |
| s1 | 0.50 | 13.6 | 3.08 |
| s2 | 0.51 | 16.4 | 1.18 |
| s3 | 0.51 | 10.3 | 5.15 |
| s4 | 0.51 | 12.4 | 3.61 |
| s6 | 0.51 | 14.6 | 2.38 |
| s7 | 0.52 | 12.5 | 3.68 |
| s8 | 0.51 | 13.8 | 2.91 |
| s9 | 0.50 | 14.3 | 2.61 |
| s10 | 0.50 | 10.8 | 4.94 |
| s11 | 0.51 | 9.7 | 5.60 |
| s12 | 0.52 | 11.3 | 4.46 |
| s13 | 0.51 | 15.4 | 1.83 |
| s14 | 0.52 | 13.6 | 2.99 |
| s15 | 0.51 | 12.1 | 4.02 |
| s16 | 0.50 | 10.5 | 5.12 |
| s17 | 0.50 | 12.2 | 3.81 |
| s18 | 0.51 | 12.8 | 3.54 |
| s19 | 0.52 | 8.9 | 6.04 |
| s20 | 0.51 | 15 | 2.12 |
| s22 | 0.51 | 15 | 2.11 |
| s23 | 0.51 | 13.7 | 2.93 |
| s24 | 0.51 | 13.3 | 3.23 |
| s26 | 0.50 | 16.7 | 1.00 |
| s27 | 0.51 | 12 | 4.11 |
| s28 | 0.50 | 14.5 | 2.47 |
| s29 | 0.51 | 10.8 | 4.85 |
| s30 | 0.50 | 13.3 | 3.26 |
| s31 | 0.50 | 15.4 | 1.86 |
| s32 | 0.51 | 13.5 | 3.10 |
| s33 | 0.51 | 15 | 2.11 |
| s34 | 0.51 | 15.3 | 1.92 |
| s37 | 0.50 | 15.4 | 1.87 |
| s38 | 0.51 | 15.7 | 1.65 |
| s39 | 0.50 | 14.5 | 2.46 |
| s40 | 0.50 | 14.4 | 2.53 |
| s41 | 0.51 | 15.1 | 2.04 |
| s43 | 0.50 | 14.3 | 2.60 |
| s44 | 0.50 | 15.4 | 1.87 |
| s45 | 0.50 | 14.4 | 2.53 |
| s46 | 0.52 | 14.3 | 2.52 |
| s47 | 0.51 | 15 | 2.12 |
| s48 | 0.51 | 14.9 | 2.18 |
| s49 | 0.51 | 13.8 | 2.90 |
| s50 | 0.51 | 13.5 | 3.12 |
| s52 | 0.52 | 12.8 | 3.49 |
| s53 | 0.51 | 16.6 | 1.06 |
| s56 | 0.50 | 14.4 | 2.54 |
| s57 | 0.51 | 12.6 | 3.68 |
| s58 | 0.51 | 13.4 | 3.17 |
| s59 | 0.50 | 12.3 | 3.93 |
| s60 | 0.51 | 14.3 | 2.35 |
| s61 | 0.50 | 10.6 | 4.86 |
| s62 | 0.50 | 9.5 | 5.59 |
| s64 | 0.51 | 16.1 | 1.18 |
| s66 | 0.51 | 14.3 | 2.38 |
| s68 | 0.51 | 13.5 | 2.87 |
| s69 | 0.51 | 14.6 | 2.17 |
| s70 | 0.50 | 14.1 | 2.54 |
| s71 | 0.51 | 11.4 | 4.27 |
| s72 | 0.51 | 7.8 | 6.57 |
| s74 | 0.51 | 12.8 | 3.37 |
| s75 | 0.51 | 12.1 | 3.83 |
| s76 | 0.52 | 13.2 | 3.05 |
| s78 | 0.51 | 12.8 | 3.32 |
| s79 | 0.51 | 14.2 | 2.43 |
| s80 | 0.52 | 15.2 | 1.75 |
| s82 | 0.52 | 12.7 | 3.38 |
| s83 | 0.50 | 13.9 | 2.66 |
| s84 | 0.51 | 9.9 | 5.26 |
| s85 | 0.51 | 9.9 | 5.26 |
| s87 | 0.51 | 12.3 | 3.68 |
| s89 | 0.51 | 17.5 | 0.26 |
| s90 | 0.51 | 14.2 | 2.45 |
| s91 | 0.51 | 9 | 5.87 |
| s93 | 0.51 | 14 | 2.55 |
| s94 | 0.50 | 16 | 1.27 |
| s95 | 0.51 | 16.6 | 0.86 |
| s96 | 0.52 | 10 | 5.10 |
| s97 | 0.52 | 12.1 | 3.74 |
| s98 | 0.51 | 9.1 | 5.80 |
| s101 | 0.51 | 16.3 | 1.05 |
| s103 | 0.51 | 17.4 | 0.33 |
| s104 | 0.51 | 15.2 | 1.79 |
| s105 | 0.51 | 16 | 1.26 |
| s107 | 0.50 | 14.6 | 2.20 |
